# Supplementary material for: One silicon atom of bis(silylene) functions as a selective Lewis base under adduct formation with a Lewis acid
Source: Royal Society of Chemistry journal article supplement (doi:10.1039/d3dt00811h), 2023-01-01
Supplement: d3dt00811h1.pdf [file d3dt00811h1.pdf]

## Electronic supplementary information

# One Silicon Atom of Bis(silylene) Functions as a Selective Lewis Base under Adduct Formation with a Lewis Acid

Yi Ding,<sup>\*,a,b</sup> Mohd Nazish,<sup>b</sup> Paul Niklas Ruth,<sup>b</sup> Regine Herbst-Irmer,<sup>b</sup> Dietmar Stalke,<sup>\*,b</sup> and Herbert W. Roesky<sup>\*,b</sup>

<sup>a</sup> *College of Chemistry and Chemical Engineering, State Key Laboratory of High-efficiency Utilization of Coal and Green Chemical Engineering, Ningxia University, Yinchuan 750021, China.*

<sup>b</sup> *Institut für Anorganische Chemie, Georg-August-Universität, 37077 Göttingen, Germany.*

*E-mail: [yiding@nxu.edu.cn](mailto:yiding@nxu.edu.cn); [dstalke@chemie.uni-goettingen.de](mailto:dstalke@chemie.uni-goettingen.de); [hroesky@gwdg.de](mailto:hroesky@gwdg.de)*

### Table of contents

|                                 |    |
|---------------------------------|----|
| NMR Spectra.....                | 2  |
| Single Crystal X-ray Data ..... | 7  |
| References.....                 | 23 |

## NMR Spectra

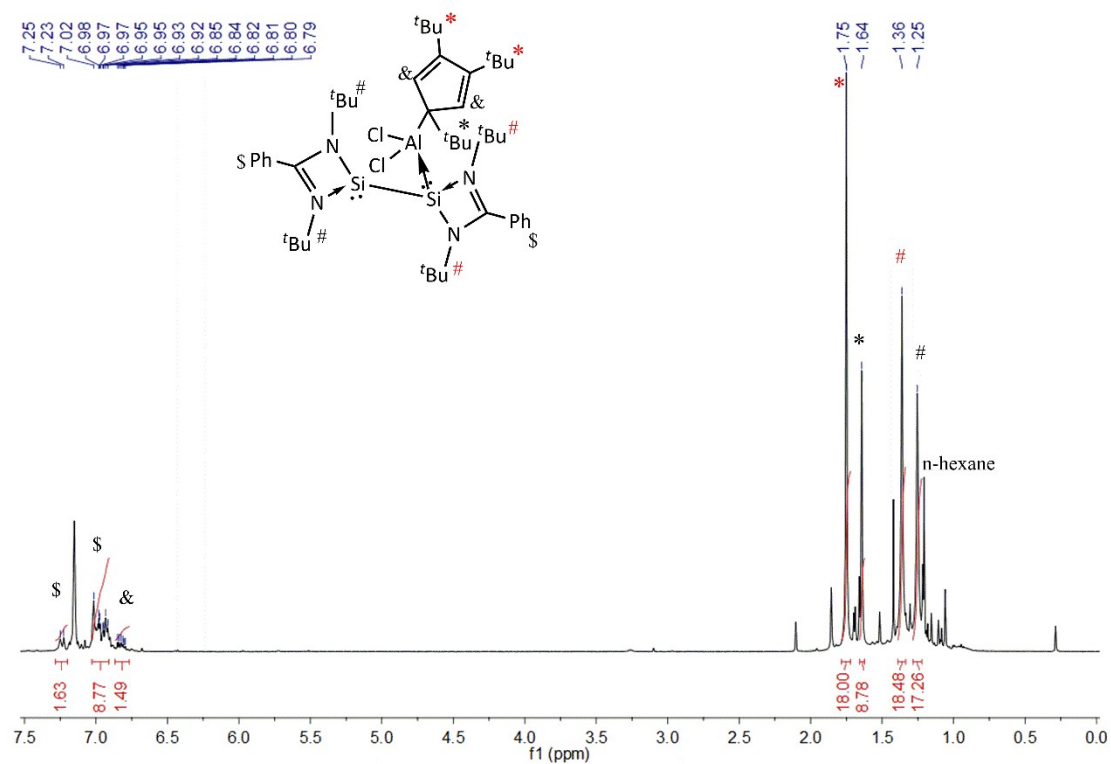

Figure S1.1 <sup>1</sup>H NMR of compound **1**.

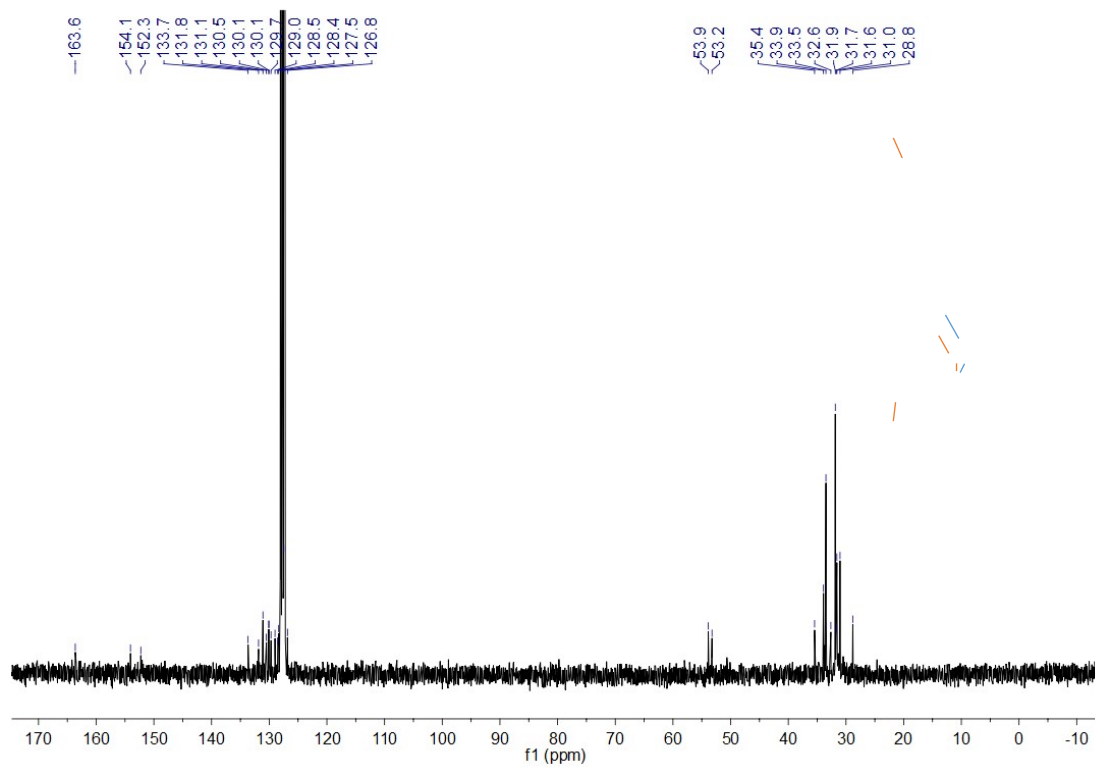

Figure S1.2 <sup>13</sup>C NMR of compound **1**.

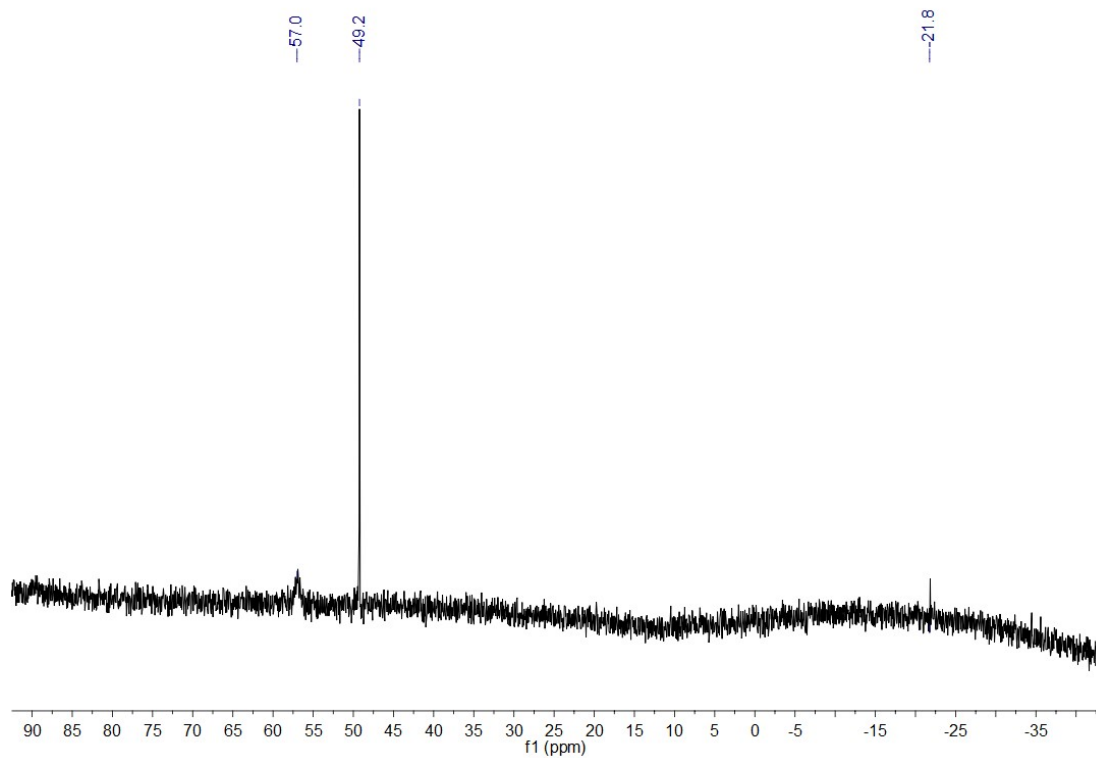

Figure S1.3  $^{29}\text{Si}$  NMR of compound **1** (grease peak at -21.8 ppm).

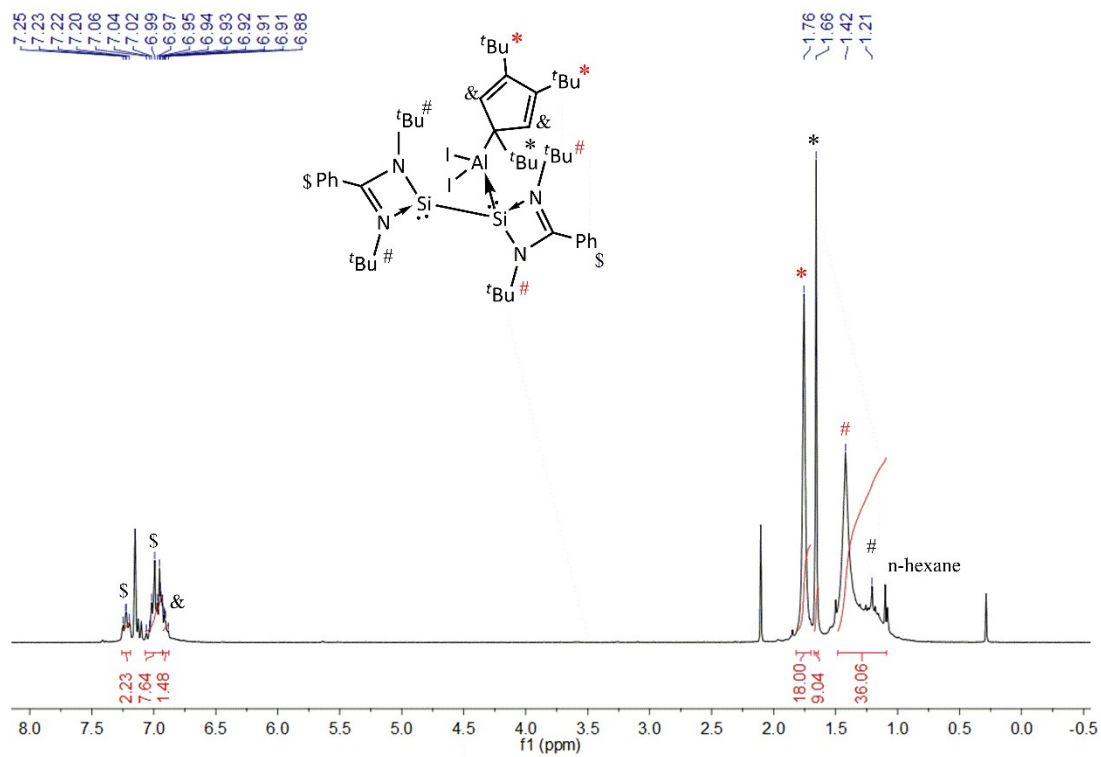

Figure S2.1  $^1\text{H}$  NMR of compound **2**.

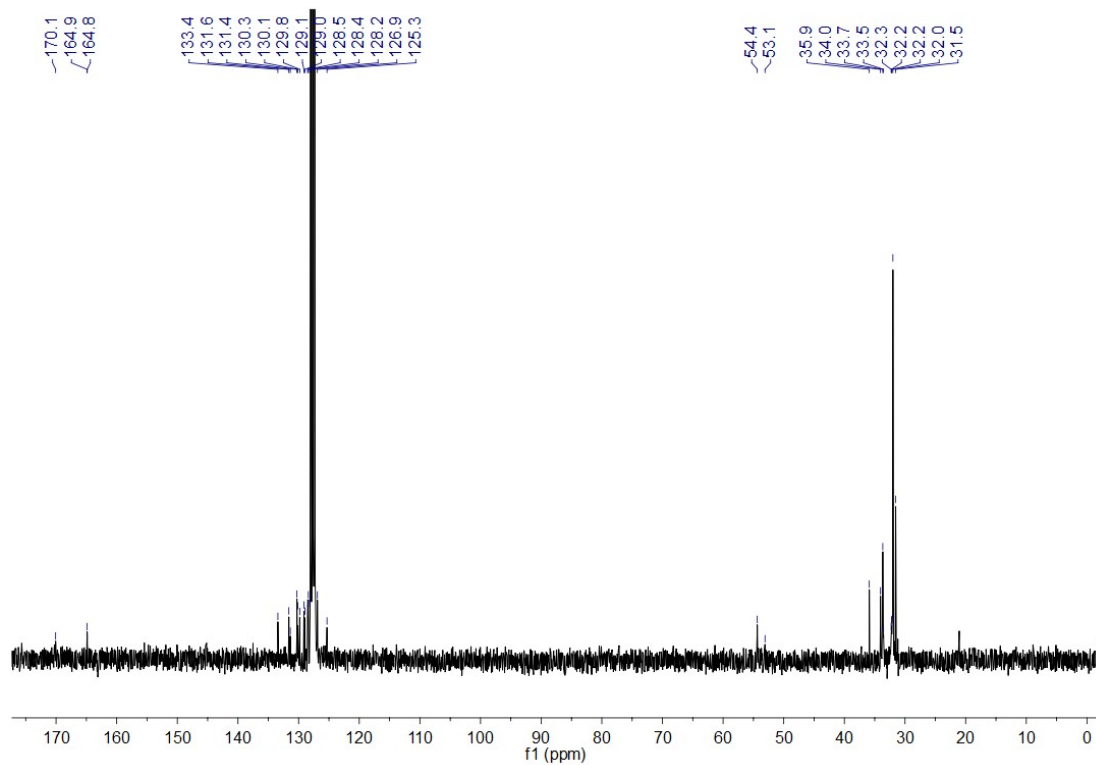

Figure S2.2  $^{13}\text{C}$  NMR of compound **2**.

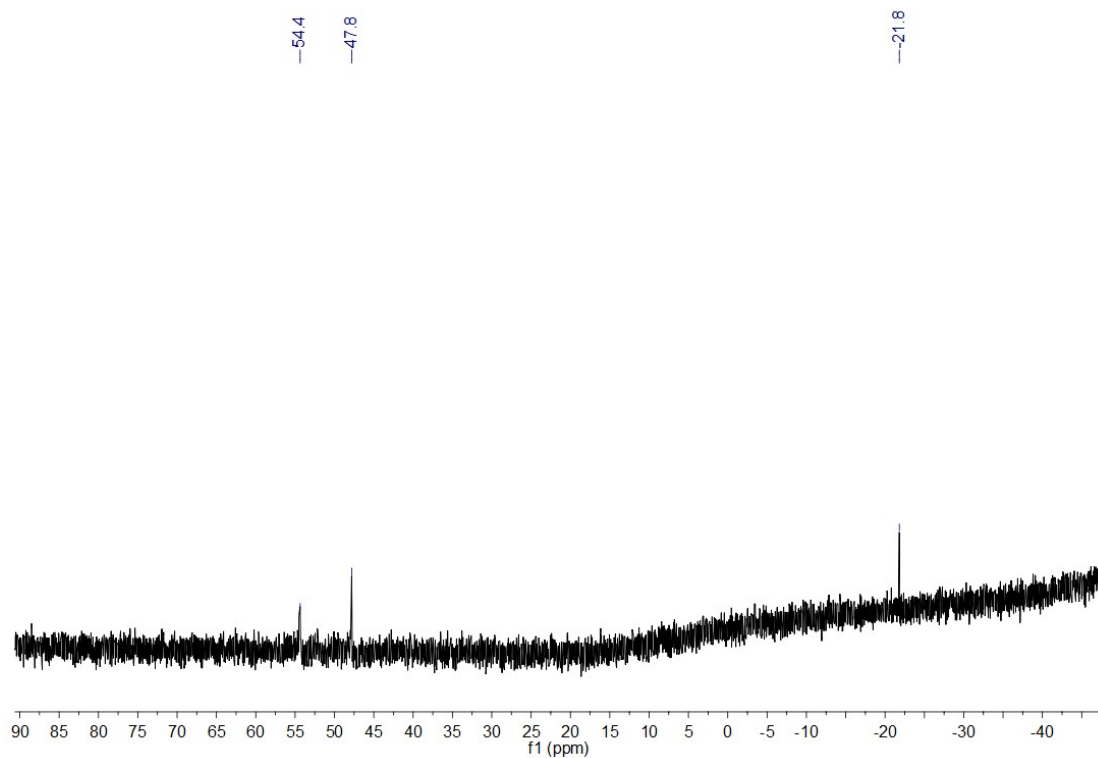

Figure S2.3  $^{29}\text{Si}$  NMR of compound **2** (grease peak at -21.8 ppm).

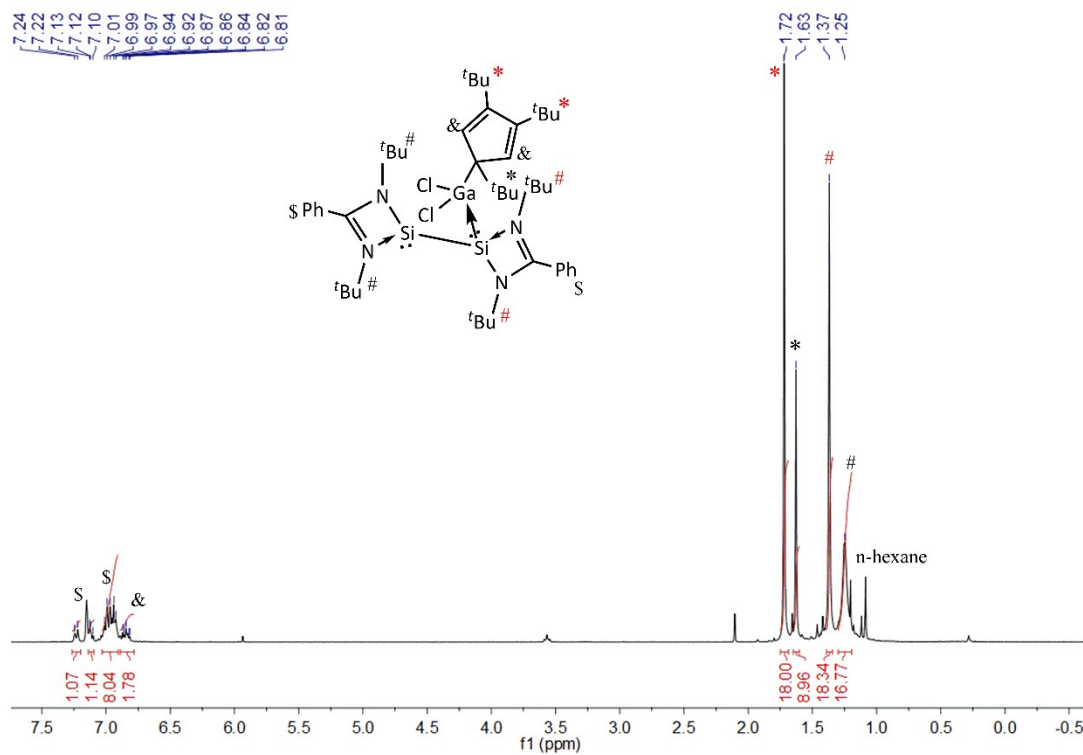

Figure S3.1 <sup>1</sup>H NMR of compound **3**.

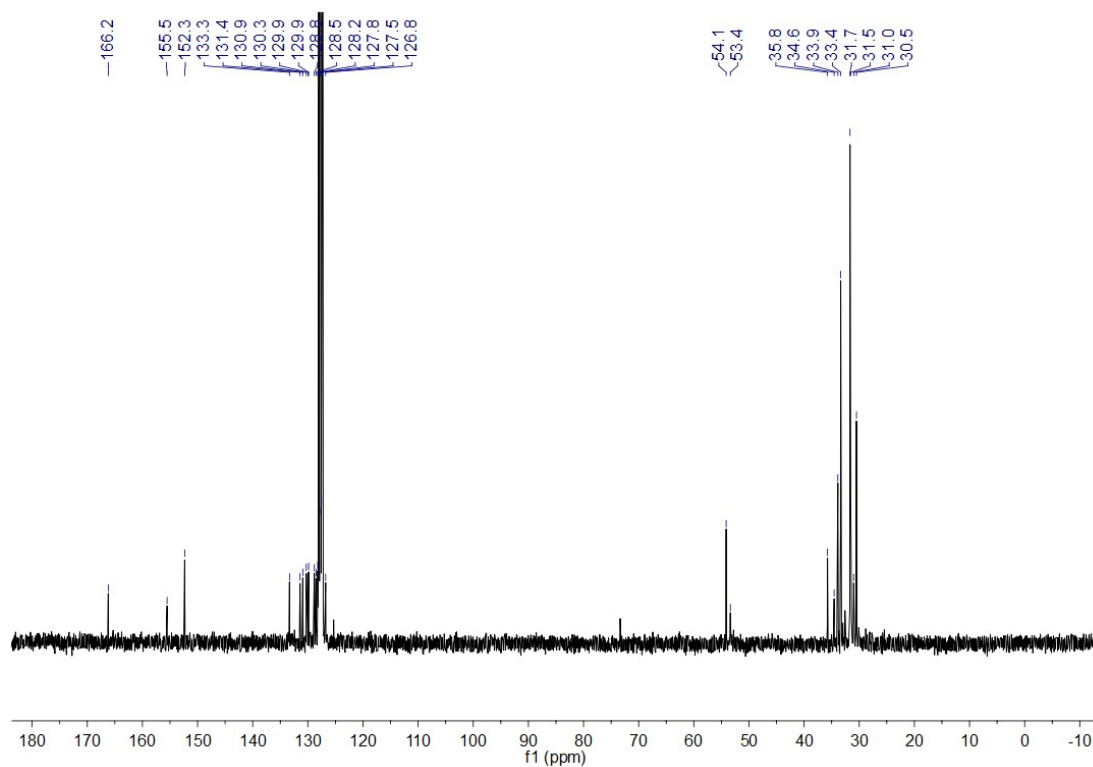

Figure S3.2 <sup>13</sup>C NMR of compound **3**.

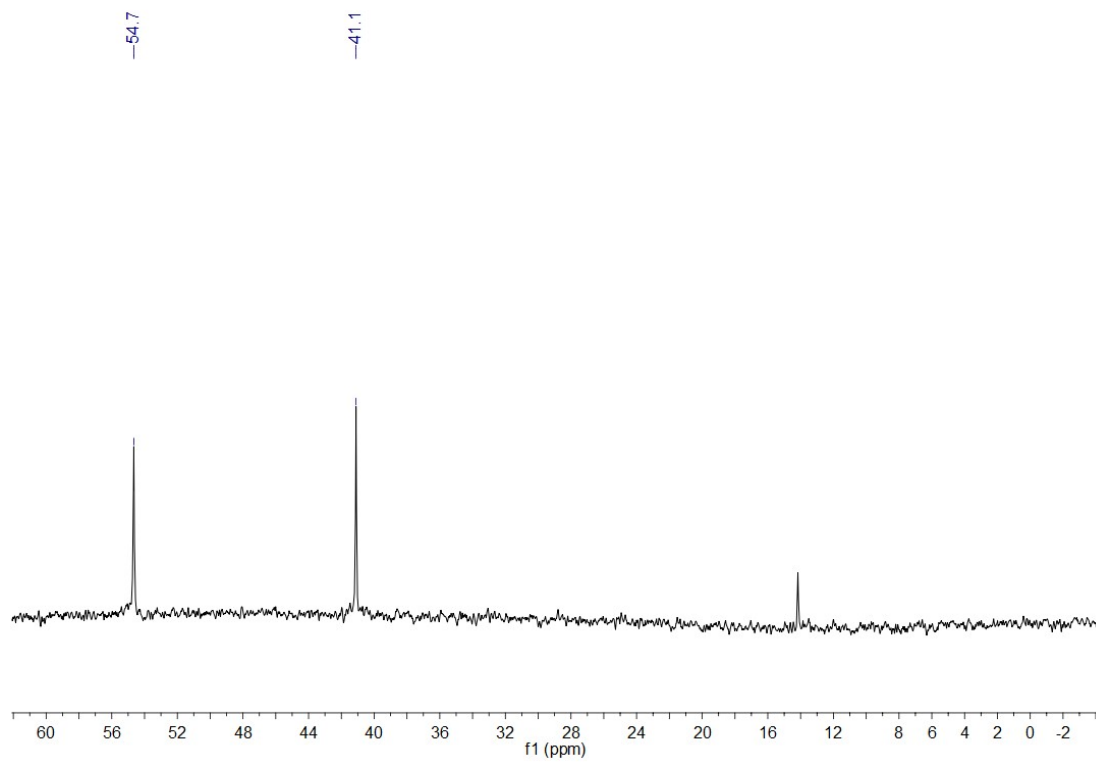

Figure S3.3  $^{29}\text{Si}$  NMR of compound **3** (unreacted  $\text{LSiCl}$  peak at 14.0 ppm).

## Single Crystal X-Ray Data

All crystals were selected under cooling, using a X-Temp2 device.<sup>1</sup> The diffraction data were collected using an Incoatec Mo Microsource<sup>2</sup> and a Bruker Apex II detector. The data were integrated with SAINT.<sup>3</sup> A multi-scan absorption correction was applied using SADABS,<sup>4</sup> which was also used to apply a  $3\lambda$  correction<sup>5</sup> for **1** and **3**. The structures were solved by SHELXT<sup>6</sup> and refined on  $F^2$  using SHELXL<sup>7</sup> in the graphical user interface ShelXle.<sup>8</sup>

**Table S1.** Crystal data and structure refinement for compounds **1-3**.

| Compound                                                 | <b>1</b>                                                                         | <b>2</b>                                                                        | <b>3</b>                                                                         |
|----------------------------------------------------------|----------------------------------------------------------------------------------|---------------------------------------------------------------------------------|----------------------------------------------------------------------------------|
| CCDC                                                     | 2248551                                                                          | 2248552                                                                         | 2248553                                                                          |
| Empirical formula                                        | C <sub>54</sub> H <sub>83</sub> AlCl <sub>2</sub> N <sub>4</sub> Si <sub>2</sub> | C <sub>61</sub> H <sub>91</sub> AlI <sub>2</sub> N <sub>4</sub> Si <sub>2</sub> | C <sub>61</sub> H <sub>91</sub> Cl <sub>2</sub> GaN <sub>4</sub> Si <sub>2</sub> |
| Formula weight                                           | 942.30                                                                           | 1217.33                                                                         | 1077.17                                                                          |
| Temperature (K)                                          | 100(2)                                                                           | 100(2)                                                                          | 100(2)                                                                           |
| Crystal system                                           | triclinic                                                                        | triclinic                                                                       | triclinic                                                                        |
| Space group                                              | $P\bar{1}$                                                                       | $P\bar{1}$                                                                      | $P\bar{1}$                                                                       |
| <i>a</i> (Å)                                             | 13.685(2)                                                                        | 12.844(2)                                                                       | 15.547(2)                                                                        |
| <i>b</i> (Å)                                             | 14.216(2)                                                                        | 14.573(2)                                                                       | 16.319(2)                                                                        |
| <i>c</i> (Å)                                             | 16.579(3)                                                                        | 18.054(3)                                                                       | 26.239(3)                                                                        |
| $\alpha$ (°)                                             | 81.82(3)                                                                         | 74.93(2)                                                                        | 79.42(2)                                                                         |
| $\beta$ (°)                                              | 68.84(2)                                                                         | 88.59(3)                                                                        | 88.48(3)                                                                         |
| $\gamma$ (°)                                             | 64.63(2)                                                                         | 72.68(2)                                                                        | 69.93(2)                                                                         |
| <i>V</i> (Å <sup>3</sup> )                               | 2717.5(9)                                                                        | 3110.0(9)                                                                       | 6141.8(15)                                                                       |
| <i>Z</i>                                                 | 2                                                                                | 2                                                                               | 4                                                                                |
| $\mu$ /mm <sup>-1</sup>                                  | 0.218                                                                            | 1.103                                                                           | 0.613                                                                            |
| Crystal size(mm)                                         | 0.372 · 0.236 · 0.138                                                            | 0.240 · 0.109 · 0.106                                                           | 0.459 · 0.325 · 0.118                                                            |
| $\theta$ max (°)                                         | 27.528                                                                           | 29.184                                                                          | 27.509                                                                           |
| Reflections collected                                    | 90699                                                                            | 143545                                                                          | 206173                                                                           |
| Independent reflections ( $R_{int}$ )                    | 12528 (0.0400)                                                                   | 16776 (0.0494)                                                                  | 28165 (0.0422)                                                                   |
| Data/restraints/parameters                               | 12528 / 518 / 685                                                                | 16776 / 87 / 654                                                                | 28165 / 2780 / 1447                                                              |
| $R1^a$ ( $I > 2\sigma(I)$ )                              | 0.0312                                                                           | 0.0265                                                                          | 0.0367                                                                           |
| $wR2^b$ (all data)                                       | 0.0776                                                                           | 0.0590                                                                          | 0.0942                                                                           |
| $\Delta\rho_{max}/\Delta\rho_{min}$ (e Å <sup>-3</sup> ) | 0.411 / -0.276                                                                   | 0.482 / -0.511                                                                  | 1.107 / -0.419                                                                   |

$$^a R1 = \sum ||F_o| - |F_c| | / \sum |F_o|. \quad ^b wR2 = [\sum w(F_o^2 - F_c^2)^2 / \sum (F_o^2)^2]^{1/2}$$

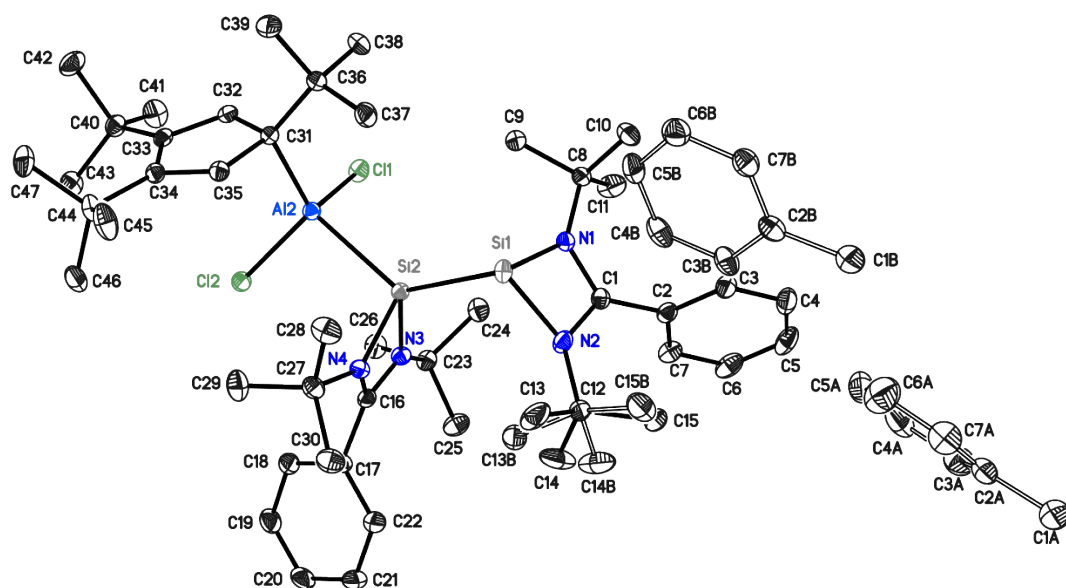

Figure S4: Asymmetric unit of **1**. Hydrogen atoms are omitted for clarity. ADPs are depicted at 50% probability level. Within the disordered *tert*-butyl group as well as the toluene molecules on special positions, equivalent bond lengths and angles were restrained to be similar. Additionally, ADPs of nearby atoms were restrained to be similar and ADPs were restrained to follow a rigid-bond model. All hydrogen atoms were placed using a riding model. Within the disordered *tert*-butyl group non-filled bonds depict the major position present at 54.9(7)%. Solid bonds depict the minor position, which occupies with a fraction of 45.1(7) %.

Table S2. Bond lengths [Å] and angles [°] for **1**.

|         |            |          |            |
|---------|------------|----------|------------|
| Cl1-Al2 | 2.2005(7)  | C3-C4    | 1.3942(18) |
| Cl2-Al2 | 2.1745(7)  | C4-C5    | 1.382(2)   |
| Si1-N1  | 1.8667(12) | C5-C6    | 1.384(2)   |
| Si1-N2  | 1.8691(11) | C6-C7    | 1.3902(19) |
| Si1-C1  | 2.3379(14) | N1-C8    | 1.4799(15) |
| Si1-Si2 | 2.4245(10) | C8-C9    | 1.5259(17) |
| Si2-N3  | 1.8295(11) | C8-C11   | 1.5274(18) |
| Si2-N4  | 1.8522(11) | C8-C10   | 1.5327(18) |
| Si2-C16 | 2.3026(13) | N2-C12   | 1.4799(16) |
| Si2-Al2 | 2.5413(9)  | C12-C14  | 1.476(4)   |
| Al2-C31 | 2.0613(13) | C12-C15B | 1.513(4)   |
| C1-N1   | 1.3367(15) | C12-C15  | 1.518(4)   |
| C1-N2   | 1.3456(16) | C12-C13B | 1.523(3)   |
| C1-C2   | 1.4922(17) | C12-C13  | 1.542(4)   |
| C2-C3   | 1.3906(18) | C12-C14B | 1.563(3)   |
| C2-C7   | 1.3943(18) | C16-N3   | 1.3348(16) |



|         |            |             |            |
|---------|------------|-------------|------------|
| C16-N4  | 1.3474(16) | C5A-C6A     | 1.373(9)   |
| C16-C17 | 1.4902(16) | C6A-C7A     | 1.393(7)   |
| C17-C22 | 1.3936(18) | C1B-C2B     | 1.506(7)   |
| C17-C18 | 1.3936(18) | C2B-C3B     | 1.385(7)   |
| C18-C19 | 1.3918(18) | C2B-C7B     | 1.387(5)   |
| C19-C20 | 1.389(2)   | C3B-C4B     | 1.383(7)   |
| C20-C21 | 1.385(2)   | C4B-C5B     | 1.382(5)   |
| C21-C22 | 1.3855(18) | C5B-C6B     | 1.386(7)   |
| N3-C23  | 1.4830(16) | C6B-C7B     | 1.389(7)   |
| C23-C25 | 1.5259(17) |             |            |
| C23-C24 | 1.5271(18) | N1-Si1-N2   | 69.50(5)   |
| C23-C26 | 1.5300(18) | N1-Si1-C1   | 34.84(5)   |
| N4-C27  | 1.4851(16) | N2-Si1-C1   | 35.12(4)   |
| C27-C29 | 1.5251(18) | N1-Si1-Si2  | 106.11(4)  |
| C27-C28 | 1.5272(18) | N2-Si1-Si2  | 106.24(4)  |
| C27-C30 | 1.5310(18) | C1-Si1-Si2  | 114.11(4)  |
| C31-C35 | 1.4643(17) | N3-Si2-N4   | 71.08(5)   |
| C31-C32 | 1.4670(17) | N3-Si2-C16  | 35.40(5)   |
| C31-C36 | 1.5547(16) | N4-Si2-C16  | 35.81(4)   |
| C32-C33 | 1.3701(17) | N3-Si2-Si1  | 118.96(4)  |
| C33-C34 | 1.4806(17) | N4-Si2-Si1  | 106.45(4)  |
| C33-C40 | 1.5363(17) | C16-Si2-Si1 | 120.49(4)  |
| C34-C35 | 1.3708(17) | N3-Si2-Al2  | 104.57(4)  |
| C34-C44 | 1.5385(17) | N4-Si2-Al2  | 109.87(4)  |
| C36-C38 | 1.5320(18) | C16-Si2-Al2 | 108.93(4)  |
| C36-C37 | 1.5329(18) | Si1-Si2-Al2 | 130.15(3)  |
| C36-C39 | 1.5408(18) | C31-Al2-Cl2 | 114.51(4)  |
| C40-C43 | 1.5327(18) | C31-Al2-Cl1 | 111.10(4)  |
| C40-C42 | 1.5352(18) | Cl2-Al2-Cl1 | 105.70(3)  |
| C40-C41 | 1.5403(19) | C31-Al2-Si2 | 121.55(4)  |
| C44-C47 | 1.5397(18) | Cl2-Al2-Si2 | 99.49(3)   |
| C44-C46 | 1.5424(19) | Cl1-Al2-Si2 | 102.66(3)  |
| C44-C45 | 1.5425(19) | N1-C1-N2    | 105.09(10) |
| C1A-C2A | 1.494(8)   | N1-C1-C2    | 128.44(11) |
| C2A-C3A | 1.371(7)   | N2-C1-C2    | 126.42(11) |
| C2A-C7A | 1.391(6)   | N1-C1-Si1   | 52.93(6)   |
| C3A-C4A | 1.378(7)   | N2-C1-Si1   | 53.04(6)   |
| C4A-C5A | 1.394(8)   | C2-C1-Si1   | 169.87(9)  |

|               |            |             |            |
|---------------|------------|-------------|------------|
| C3-C2-C7      | 119.64(12) | C22-C17-C18 | 119.99(12) |
| C3-C2-C1      | 120.82(11) | C22-C17-C16 | 120.60(11) |
| C7-C2-C1      | 119.52(11) | C18-C17-C16 | 119.16(11) |
| C2-C3-C4      | 119.97(13) | C19-C18-C17 | 119.75(12) |
| C5-C4-C3      | 120.06(13) | C20-C19-C18 | 119.95(13) |
| C4-C5-C6      | 120.23(13) | C21-C20-C19 | 120.21(12) |
| C5-C6-C7      | 120.10(13) | C20-C21-C22 | 120.21(13) |
| C6-C7-C2      | 119.99(13) | C21-C22-C17 | 119.88(13) |
| C1-N1-C8      | 131.28(10) | C16-N3-C23  | 132.48(10) |
| C1-N1-Si1     | 92.23(8)   | C16-N3-Si2  | 92.03(8)   |
| C8-N1-Si1     | 134.67(8)  | C23-N3-Si2  | 135.48(8)  |
| N1-C8-C9      | 105.55(10) | N3-C23-C25  | 111.80(11) |
| N1-C8-C11     | 111.90(10) | N3-C23-C24  | 104.61(10) |
| C9-C8-C11     | 109.68(11) | C25-C23-C24 | 108.68(10) |
| N1-C8-C10     | 110.43(10) | N3-C23-C26  | 111.19(10) |
| C9-C8-C10     | 108.86(11) | C25-C23-C26 | 110.38(11) |
| C11-C8-C10    | 110.28(11) | C24-C23-C26 | 110.01(11) |
| C1-N2-C12     | 130.46(10) | C16-N4-C27  | 130.25(10) |
| C1-N2-Si1     | 91.84(8)   | C16-N4-Si2  | 90.64(8)   |
| C12-N2-Si1    | 133.25(9)  | C27-N4-Si2  | 135.96(8)  |
| C14-C12-N2    | 106.09(18) | N4-C27-C29  | 110.47(11) |
| N2-C12-C15B   | 110.90(18) | N4-C27-C28  | 105.29(10) |
| C14-C12-C15   | 112.5(3)   | C29-C27-C28 | 109.79(11) |
| N2-C12-C15    | 114.32(19) | N4-C27-C30  | 112.10(10) |
| N2-C12-C13B   | 106.65(14) | C29-C27-C30 | 109.73(11) |
| C15B-C12-C13B | 110.2(2)   | C28-C27-C30 | 109.36(11) |
| C14-C12-C13   | 112.0(3)   | C35-C31-C32 | 101.90(10) |
| N2-C12-C13    | 103.55(16) | C35-C31-C36 | 116.62(10) |
| C15-C12-C13   | 108.1(2)   | C32-C31-C36 | 118.54(10) |
| N2-C12-C14B   | 113.73(17) | C35-C31-Al2 | 103.59(8)  |
| C15B-C12-C14B | 108.6(2)   | C32-C31-Al2 | 91.84(8)   |
| C13B-C12-C14B | 106.7(2)   | C36-C31-Al2 | 120.24(8)  |
| N3-C16-N4     | 105.86(10) | C33-C32-C31 | 111.79(11) |
| N3-C16-C17    | 125.14(11) | C32-C33-C34 | 107.19(11) |
| N4-C16-C17    | 129.00(11) | C32-C33-C40 | 120.25(11) |
| N3-C16-Si2    | 52.57(6)   | C34-C33-C40 | 132.56(11) |
| N4-C16-Si2    | 53.55(6)   | C35-C34-C33 | 106.52(11) |
| C17-C16-Si2   | 174.63(9)  | C35-C34-C44 | 121.07(11) |

|             |            |             |            |
|-------------|------------|-------------|------------|
| C33-C34-C44 | 132.39(11) | C47-C44-C45 | 105.50(12) |
| C34-C35-C31 | 112.36(11) | C46-C44-C45 | 106.41(11) |
| C38-C36-C37 | 109.33(10) | C3A-C2A-C7A | 118.1(5)   |
| C38-C36-C39 | 108.24(11) | C3A-C2A-C1A | 121.6(5)   |
| C37-C36-C39 | 108.56(11) | C7A-C2A-C1A | 120.3(5)   |
| C38-C36-C31 | 111.73(11) | C2A-C3A-C4A | 122.5(5)   |
| C37-C36-C31 | 111.14(10) | C3A-C4A-C5A | 119.3(5)   |
| C39-C36-C31 | 107.74(10) | C6A-C5A-C4A | 118.9(6)   |
| C43-C40-C42 | 109.96(11) | C5A-C6A-C7A | 121.2(5)   |
| C43-C40-C33 | 113.83(10) | C2A-C7A-C6A | 119.9(5)   |
| C42-C40-C33 | 109.42(10) | C3B-C2B-C7B | 117.5(5)   |
| C43-C40-C41 | 105.73(11) | C3B-C2B-C1B | 121.3(4)   |
| C42-C40-C41 | 107.48(11) | C7B-C2B-C1B | 121.1(5)   |
| C33-C40-C41 | 110.19(10) | C4B-C3B-C2B | 121.6(5)   |
| C34-C44-C47 | 112.62(11) | C5B-C4B-C3B | 120.4(5)   |
| C34-C44-C46 | 112.49(11) | C4B-C5B-C6B | 118.9(5)   |
| C47-C44-C46 | 109.81(11) | C5B-C6B-C7B | 120.2(4)   |
| C34-C44-C45 | 109.59(10) | C2B-C7B-C6B | 121.4(5)   |

---

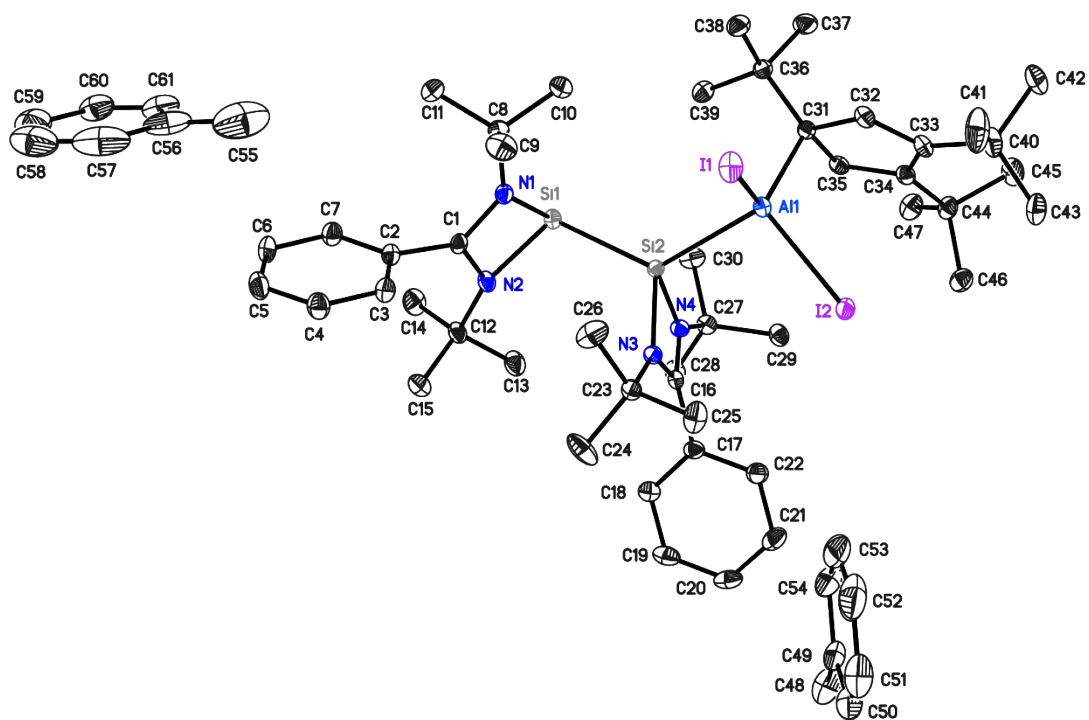

Figure S5: Asymmetric unit of **2**. Hydrogen atoms are omitted for clarity. ADPs are depicted at 50% probability level. All hydrogen atoms were placed using a riding model. The anisotropic displacement parameters of one toluene molecule (C55 to C61) were restrained by similarity and rigid bond restraints.

Table S3. Bond lengths [ $\text{\AA}$ ] and angles [ $^\circ$ ] for **2**.

|         |            |         |          |
|---------|------------|---------|----------|
| I1-Al1  | 2.6040(8)  | C1-C2   | 1.488(2) |
| I2-Al1  | 2.5740(7)  | C2-C3   | 1.391(2) |
| Si1-N1  | 1.8659(15) | C2-C7   | 1.395(2) |
| Si1-N2  | 1.8669(15) | C3-C4   | 1.387(2) |
| Si1-C1  | 2.3343(18) | C4-C5   | 1.388(3) |
| Si1-Si2 | 2.4399(8)  | C5-C6   | 1.386(3) |
| Si2-N3  | 1.8396(14) | C6-C7   | 1.389(2) |
| Si2-N4  | 1.8492(15) | C8-C9   | 1.524(3) |
| Si2-C16 | 2.3130(18) | C8-C10  | 1.527(2) |
| Si2-Al1 | 2.5505(9)  | C8-C11  | 1.534(2) |
| Al1-C31 | 2.0725(17) | C12-C13 | 1.525(2) |
| N1-C1   | 1.340(2)   | C12-C15 | 1.526(2) |
| N1-C8   | 1.481(2)   | C12-C14 | 1.527(2) |
| N2-C1   | 1.346(2)   | N3-C16  | 1.341(2) |
| N2-C12  | 1.479(2)   | N3-C23  | 1.488(2) |

|         |          |             |            |
|---------|----------|-------------|------------|
| N4-C16  | 1.342(2) | C53-C54     | 1.391(4)   |
| N4-C27  | 1.484(2) | C55-C56     | 1.500(4)   |
| C16-C17 | 1.496(2) | C56-C61     | 1.389(3)   |
| C17-C22 | 1.387(2) | C56-C57     | 1.404(4)   |
| C17-C18 | 1.397(2) | C57-C58     | 1.388(4)   |
| C18-C19 | 1.391(2) | C58-C59     | 1.370(4)   |
| C19-C20 | 1.385(3) | C59-C60     | 1.377(3)   |
| C20-C21 | 1.381(3) | C60-C61     | 1.368(3)   |
| C21-C22 | 1.398(2) |             |            |
| C23-C26 | 1.521(2) | N1-Si1-N2   | 69.73(7)   |
| C23-C25 | 1.521(2) | N1-Si1-C1   | 35.02(6)   |
| C23-C24 | 1.524(2) | N2-Si1-C1   | 35.19(6)   |
| C27-C30 | 1.527(2) | N1-Si1-Si2  | 104.43(5)  |
| C27-C29 | 1.528(2) | N2-Si1-Si2  | 105.07(5)  |
| C27-C28 | 1.530(2) | C1-Si1-Si2  | 112.45(5)  |
| C31-C32 | 1.471(2) | N3-Si2-N4   | 70.77(7)   |
| C31-C35 | 1.471(2) | N3-Si2-C16  | 35.41(6)   |
| C31-C36 | 1.560(2) | N4-Si2-C16  | 35.45(6)   |
| C32-C33 | 1.366(2) | N3-Si2-Si1  | 118.37(5)  |
| C33-C34 | 1.487(2) | N4-Si2-Si1  | 106.53(5)  |
| C33-C40 | 1.543(2) | C16-Si2-Si1 | 119.56(5)  |
| C34-C35 | 1.368(2) | N3-Si2-Al1  | 109.26(5)  |
| C34-C44 | 1.538(2) | N4-Si2-Al1  | 109.03(6)  |
| C36-C39 | 1.527(2) | C16-Si2-Al1 | 111.90(5)  |
| C36-C38 | 1.534(2) | Si1-Si2-Al1 | 127.44(3)  |
| C36-C37 | 1.541(2) | C31-Al1-Si2 | 123.74(5)  |
| C40-C43 | 1.536(3) | C31-Al1-I2  | 111.97(5)  |
| C40-C41 | 1.539(3) | Si2-Al1-I2  | 101.05(3)  |
| C40-C42 | 1.544(3) | C31-Al1-I1  | 111.96(6)  |
| C44-C45 | 1.536(2) | Si2-Al1-I1  | 102.49(3)  |
| C44-C47 | 1.542(3) | I2-Al1-I1   | 103.28(2)  |
| C44-C46 | 1.544(2) | C1-N1-C8    | 129.75(14) |
| C48-C49 | 1.505(3) | C1-N1-Si1   | 91.96(11)  |
| C49-C54 | 1.385(3) | C8-N1-Si1   | 135.38(11) |
| C49-C50 | 1.387(3) | C1-N2-C12   | 130.27(14) |
| C50-C51 | 1.381(3) | C1-N2-Si1   | 91.73(11)  |
| C51-C52 | 1.380(4) | C12-N2-Si1  | 133.06(12) |
| C52-C53 | 1.375(4) | N1-C1-N2    | 105.20(14) |

|             |            |             |            |
|-------------|------------|-------------|------------|
| N1-C1-C2    | 128.47(15) | C22-C17-C16 | 119.46(15) |
| N2-C1-C2    | 126.33(15) | C18-C17-C16 | 121.17(15) |
| N1-C1-Si1   | 53.02(8)   | C19-C18-C17 | 120.18(17) |
| N2-C1-Si1   | 53.07(8)   | C20-C19-C18 | 120.06(17) |
| C2-C1-Si1   | 171.17(12) | C21-C20-C19 | 120.15(17) |
| C3-C2-C7    | 119.67(16) | C20-C21-C22 | 120.03(18) |
| C3-C2-C1    | 119.34(15) | C17-C22-C21 | 120.19(17) |
| C7-C2-C1    | 120.93(15) | N3-C23-C26  | 105.50(13) |
| C4-C3-C2    | 120.21(16) | N3-C23-C25  | 111.14(14) |
| C3-C4-C5    | 119.93(17) | C26-C23-C25 | 109.99(16) |
| C6-C5-C4    | 120.17(17) | N3-C23-C24  | 110.68(14) |
| C5-C6-C7    | 120.10(17) | C26-C23-C24 | 109.36(16) |
| C6-C7-C2    | 119.88(17) | C25-C23-C24 | 110.06(16) |
| N1-C8-C9    | 110.65(14) | N4-C27-C30  | 105.73(13) |
| N1-C8-C10   | 105.23(14) | N4-C27-C29  | 110.47(14) |
| C9-C8-C10   | 109.78(15) | C30-C27-C29 | 109.66(14) |
| N1-C8-C11   | 111.12(14) | N4-C27-C28  | 111.52(13) |
| C9-C8-C11   | 110.67(16) | C30-C27-C28 | 108.76(14) |
| C10-C8-C11  | 109.23(15) | C29-C27-C28 | 110.58(14) |
| N2-C12-C13  | 104.67(13) | C32-C31-C35 | 101.33(14) |
| N2-C12-C15  | 112.52(14) | C32-C31-C36 | 117.66(14) |
| C13-C12-C15 | 109.68(15) | C35-C31-C36 | 116.24(14) |
| N2-C12-C14  | 110.56(14) | C32-C31-Al1 | 95.40(11)  |
| C13-C12-C14 | 108.76(16) | C35-C31-Al1 | 104.41(11) |
| C15-C12-C14 | 110.46(15) | C36-C31-Al1 | 118.51(11) |
| C16-N3-C23  | 130.98(14) | C33-C32-C31 | 112.36(15) |
| C16-N3-Si2  | 91.95(10)  | C32-C33-C34 | 106.98(15) |
| C23-N3-Si2  | 137.05(11) | C32-C33-C40 | 120.11(16) |
| C16-N4-C27  | 130.20(14) | C34-C33-C40 | 132.90(16) |
| C16-N4-Si2  | 91.50(10)  | C35-C34-C33 | 106.51(15) |
| C27-N4-Si2  | 137.00(11) | C35-C34-C44 | 121.93(15) |
| N3-C16-N4   | 105.55(14) | C33-C34-C44 | 131.56(15) |
| N3-C16-C17  | 126.91(15) | C34-C35-C31 | 112.63(15) |
| N4-C16-C17  | 127.52(15) | C39-C36-C38 | 108.83(15) |
| N3-C16-Si2  | 52.65(8)   | C39-C36-C37 | 108.12(15) |
| N4-C16-Si2  | 53.06(8)   | C38-C36-C37 | 107.30(14) |
| C17-C16-Si2 | 175.45(12) | C39-C36-C31 | 111.73(14) |
| C22-C17-C18 | 119.36(16) | C38-C36-C31 | 112.32(14) |

|             |            |             |          |
|-------------|------------|-------------|----------|
| C37-C36-C31 | 108.35(14) | C50-C49-C48 | 120.2(2) |
| C43-C40-C41 | 105.24(17) | C51-C50-C49 | 121.1(2) |
| C43-C40-C33 | 114.67(16) | C52-C51-C50 | 120.1(2) |
| C41-C40-C33 | 109.18(15) | C53-C52-C51 | 119.5(2) |
| C43-C40-C42 | 110.26(16) | C52-C53-C54 | 120.4(2) |
| C41-C40-C42 | 107.61(18) | C49-C54-C53 | 120.5(2) |
| C33-C40-C42 | 109.58(16) | C61-C56-C57 | 116.5(3) |
| C45-C44-C34 | 112.99(15) | C61-C56-C55 | 121.0(3) |
| C45-C44-C47 | 105.26(15) | C57-C56-C55 | 122.5(2) |
| C34-C44-C47 | 109.90(14) | C58-C57-C56 | 121.3(2) |
| C45-C44-C46 | 109.89(15) | C59-C58-C57 | 120.6(3) |
| C34-C44-C46 | 111.75(14) | C58-C59-C60 | 118.6(3) |
| C47-C44-C46 | 106.66(15) | C61-C60-C59 | 121.3(2) |
| C54-C49-C50 | 118.3(2)   | C60-C61-C56 | 121.7(2) |
| C54-C49-C48 | 121.5(2)   |             |          |

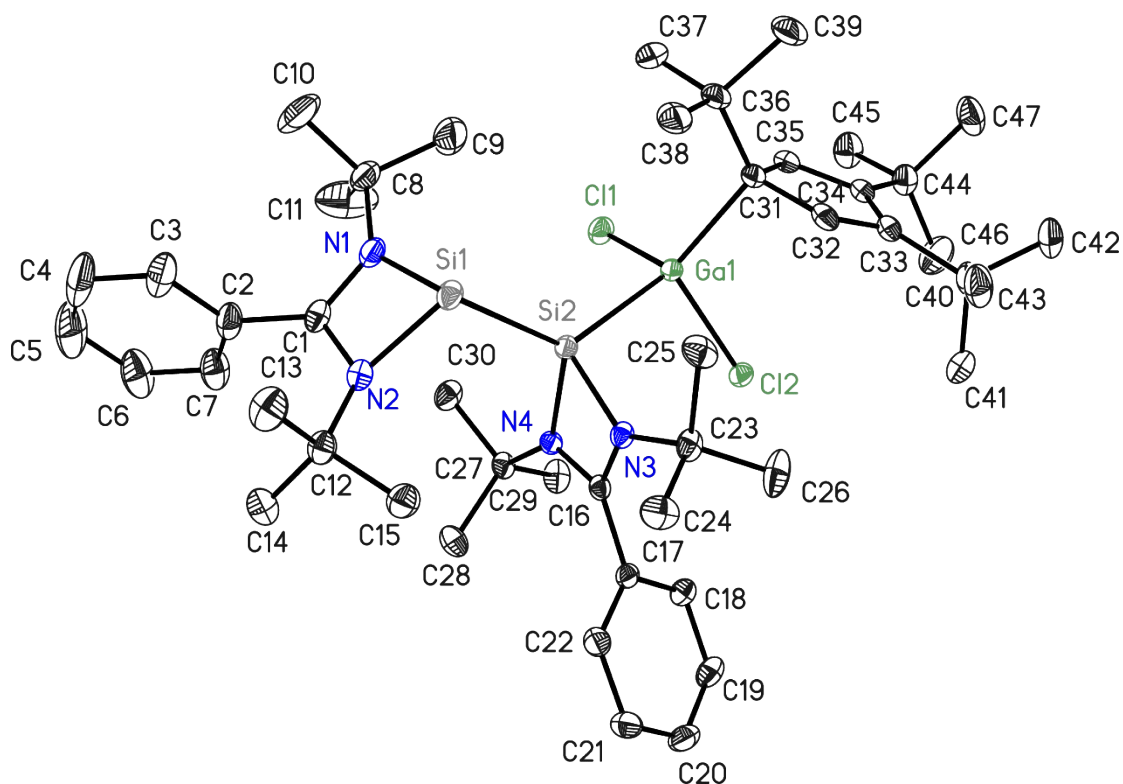

Figure S6: Structure of molecule 1 of **3**. Hydrogen atoms are omitted for clarity. ADPs are depicted at 50% probability level. All hydrogen atoms were placed using a riding model.

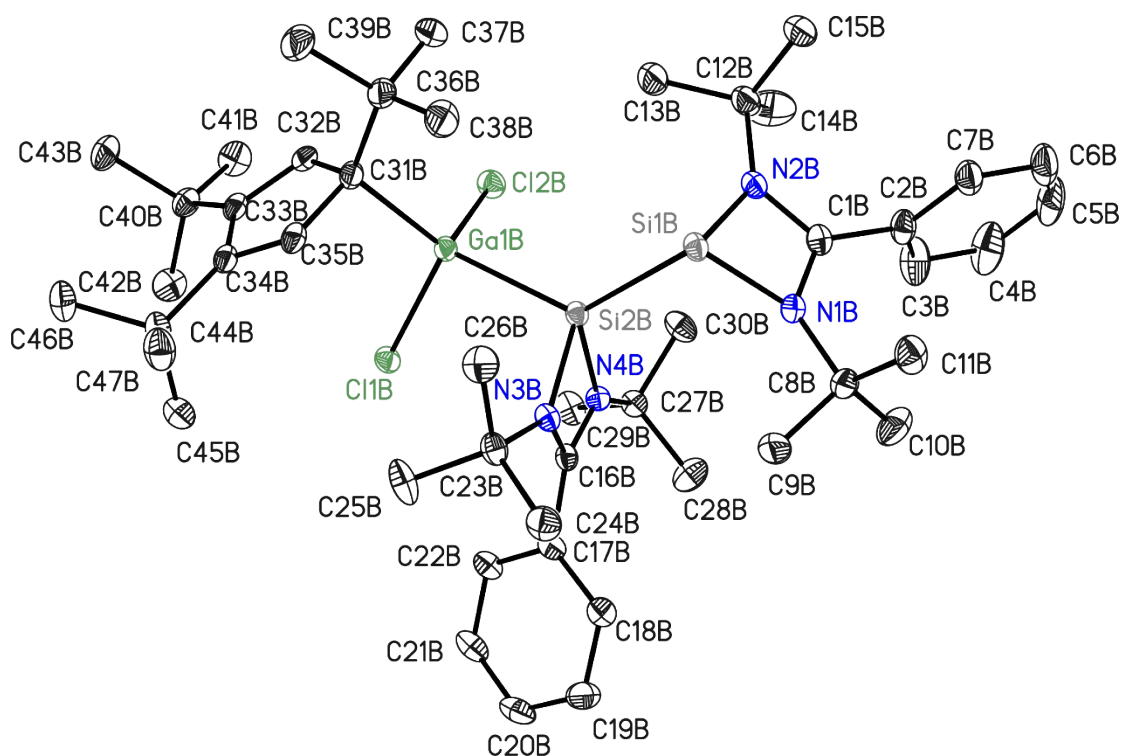

Figure S7: Structure of molecule 2 of **3**. Hydrogen atoms are omitted for clarity. ADPs are depicted at 50% probability level. All hydrogen atoms were placed using a riding model.

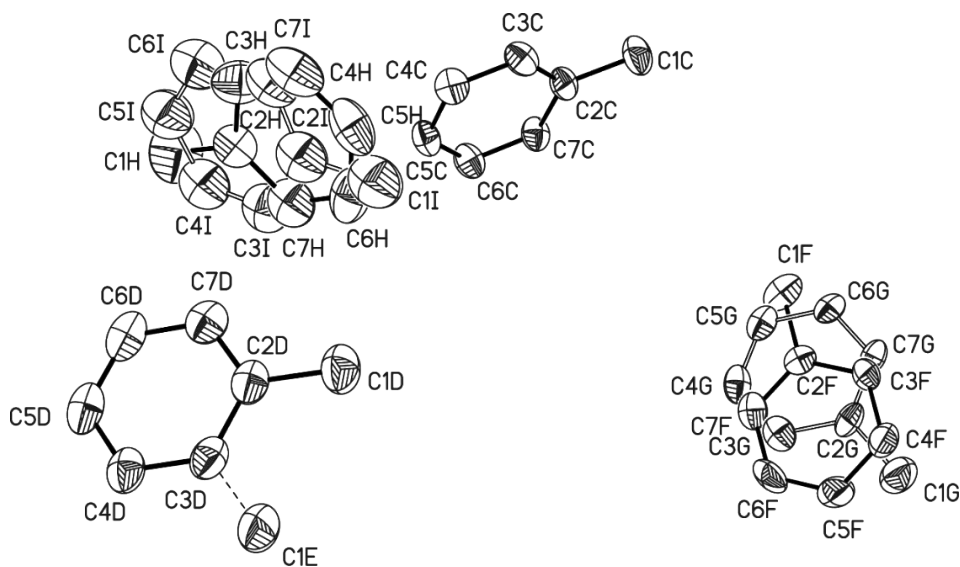

Figure S8: Structure of the solvent molecules of **3**. Hydrogen atoms are omitted for clarity. ADPs are depicted at 50% probability level. All hydrogen atoms were placed using a riding model. All toluene molecules were restrained to have similar bond lengths and angles between different molecules and for all bond lengths and angles within the benzene ring. Additionally, the individual molecules were restrained to lie in a plane. The atomic displacement parameters of disordered toluene molecules were restrained by similarity and rigid bond restraints. The positions and atomic displacement parameters of the benzene ring of one toluene molecule (C2D to C7D) were constrained to be identical to its counterpart (C2E to C7E). The occupancies of the minor positions refine to 0.350 (E), 0.415(4) (G), 0.185(4) (I).



Table S4: Bond lengths [ $\text{\AA}$ ] and angles [ $^\circ$ ] for **3**.

|         |            |           |            |
|---------|------------|-----------|------------|
| Cl1-Ga1 | 2.2788(8)  | C19-C20   | 1.386(3)   |
| Ga1-C31 | 2.0688(17) | C20-C21   | 1.387(3)   |
| Ga1-Cl2 | 2.2368(6)  | C21-C22   | 1.392(2)   |
| Ga1-Si2 | 2.4910(7)  | C23-C25   | 1.526(2)   |
| Si1-N1  | 1.8621(16) | C23-C26   | 1.528(2)   |
| Si1-N2  | 1.8755(16) | C23-C24   | 1.534(3)   |
| Si1-C1  | 2.3312(19) | C27-C30   | 1.526(2)   |
| Si1-Si2 | 2.4339(7)  | C27-C28   | 1.528(2)   |
| N1-C1   | 1.330(2)   | C27-C29   | 1.532(2)   |
| N1-C8   | 1.482(2)   | C31-C32   | 1.475(2)   |
| C1-N2   | 1.350(2)   | C31-C35   | 1.478(2)   |
| C1-C2   | 1.491(3)   | C31-C36   | 1.558(2)   |
| Si2-N4  | 1.8271(14) | C32-C33   | 1.358(2)   |
| Si2-N3  | 1.8427(15) | C33-C34   | 1.502(2)   |
| Si2-C16 | 2.2999(17) | C33-C40   | 1.539(2)   |
| N2-C12  | 1.487(2)   | C34-C35   | 1.360(2)   |
| C2-C3   | 1.391(3)   | C34-C44   | 1.535(2)   |
| C2-C7   | 1.397(3)   | C36-C38   | 1.534(3)   |
| N3-C16  | 1.346(2)   | C36-C37   | 1.534(3)   |
| N3-C23  | 1.486(2)   | C36-C39   | 1.543(3)   |
| C3-C4   | 1.403(3)   | C40-C42   | 1.537(3)   |
| N4-C16  | 1.340(2)   | C40-C41   | 1.539(3)   |
| N4-C27  | 1.483(2)   | C40-C43   | 1.544(3)   |
| C4-C5   | 1.382(4)   | C44-C46   | 1.532(3)   |
| C5-C6   | 1.377(4)   | C44-C45   | 1.540(3)   |
| C6-C7   | 1.384(3)   | C44-C47   | 1.548(3)   |
| C8-C9   | 1.508(3)   | Cl1B-Ga1B | 2.2375(6)  |
| C8-C11  | 1.520(3)   | Ga1B-C31B | 2.0793(18) |
| C8-C10  | 1.522(3)   | Ga1B-Cl2B | 2.2777(8)  |
| C12-C15 | 1.526(2)   | Ga1B-Si2B | 2.4788(7)  |
| C12-C14 | 1.529(3)   | Si1B-N2B  | 1.8589(16) |
| C12-C13 | 1.531(2)   | Si1B-N1B  | 1.8641(15) |
| C16-C17 | 1.488(2)   | Si1B-C1B  | 2.3264(19) |
| C17-C22 | 1.390(2)   | Si1B-Si2B | 2.4282(7)  |
| C17-C18 | 1.397(2)   | N1B-C1B   | 1.345(2)   |
| C18-C19 | 1.392(2)   | N1B-C8B   | 1.476(2)   |

|           |            |           |          |
|-----------|------------|-----------|----------|
| C1B-N2B   | 1.335(2)   | C32B-C33B | 1.361(2) |
| C1B-C2B   | 1.489(2)   | C33B-C34B | 1.500(2) |
| Si2B-N4B  | 1.8320(14) | C33B-C40B | 1.540(2) |
| Si2B-N3B  | 1.8427(15) | C34B-C35B | 1.362(2) |
| Si2B-C16B | 2.2996(17) | C34B-C44B | 1.542(2) |
| N2B-C12B  | 1.478(2)   | C36B-C37B | 1.526(3) |
| C2B-C7B   | 1.391(3)   | C36B-C38B | 1.533(3) |
| C2B-C3B   | 1.396(3)   | C36B-C39B | 1.543(3) |
| N3B-C16B  | 1.345(2)   | C40B-C42B | 1.533(2) |
| N3B-C23B  | 1.488(2)   | C40B-C41B | 1.537(3) |
| C3B-C4B   | 1.383(3)   | C40B-C43B | 1.539(2) |
| N4B-C16B  | 1.337(2)   | C44B-C46B | 1.536(3) |
| N4B-C27B  | 1.483(2)   | C44B-C45B | 1.539(3) |
| C4B-C5B   | 1.380(4)   | C44B-C47B | 1.541(3) |
| C5B-C6B   | 1.378(3)   | C1C-C2C   | 1.508(3) |
| C6B-C7B   | 1.395(3)   | C2C-C7C   | 1.387(3) |
| C8B-C9B   | 1.526(3)   | C2C-C3C   | 1.392(3) |
| C8B-C10B  | 1.530(3)   | C3C-C4C   | 1.383(3) |
| C8B-C11B  | 1.531(2)   | C4C-C5C   | 1.382(3) |
| C12B-C13B | 1.517(3)   | C5C-C6C   | 1.381(3) |
| C12B-C15B | 1.528(3)   | C6C-C7C   | 1.386(3) |
| C12B-C14B | 1.537(3)   | C1D-C2D   | 1.502(4) |
| C16B-C17B | 1.488(2)   | C2D-C7D   | 1.390(3) |
| C17B-C22B | 1.394(2)   | C2D-C3D   | 1.391(3) |
| C17B-C18B | 1.395(2)   | C3D-C4D   | 1.385(3) |
| C18B-C19B | 1.392(2)   | C4D-C5D   | 1.380(3) |
| C19B-C20B | 1.384(3)   | C5D-C6D   | 1.373(4) |
| C20B-C21B | 1.381(3)   | C6D-C7D   | 1.386(3) |
| C21B-C22B | 1.393(2)   | C1E-C2E   | 1.489(7) |
| C23B-C26B | 1.523(2)   | C2E-C7E   | 1.385(3) |
| C23B-C25B | 1.528(2)   | C2E-C3E   | 1.391(3) |
| C23B-C24B | 1.531(2)   | C3E-C4E   | 1.390(3) |
| C27B-C30B | 1.528(2)   | C4E-C5E   | 1.386(3) |
| C27B-C28B | 1.528(2)   | C5E-C6E   | 1.373(4) |
| C27B-C29B | 1.529(2)   | C6E-C7E   | 1.380(3) |
| C31B-C35B | 1.474(2)   | C1F-C2F   | 1.487(6) |
| C31B-C32B | 1.475(2)   | C2F-C7F   | 1.387(6) |
| C31B-C36B | 1.559(2)   | C2F-C3F   | 1.392(8) |

|             |           |             |            |
|-------------|-----------|-------------|------------|
| C3F-C4F     | 1.373(7)  | C1-N1-C8    | 131.35(15) |
| C4F-C5F     | 1.374(6)  | C1-N1-Si1   | 92.30(11)  |
| C5F-C6F     | 1.369(6)  | C8-N1-Si1   | 135.86(13) |
| C6F-C7F     | 1.381(7)  | N1-C1-N2    | 105.49(15) |
| C1G-C2G     | 1.506(8)  | N1-C1-C2    | 126.96(16) |
| C2G-C7G     | 1.375(9)  | N2-C1-C2    | 127.53(16) |
| C2G-C3G     | 1.406(8)  | N1-C1-Si1   | 52.95(9)   |
| C3G-C4G     | 1.374(8)  | N2-C1-Si1   | 53.55(9)   |
| C4G-C5G     | 1.363(9)  | C2-C1-Si1   | 170.25(13) |
| C5G-C6G     | 1.390(8)  | N4-Si2-N3   | 71.33(6)   |
| C6G-C7G     | 1.379(9)  | N4-Si2-C16  | 35.62(6)   |
| C1H-C2H     | 1.490(5)  | N3-Si2-C16  | 35.80(6)   |
| C2H-C3H     | 1.383(5)  | N4-Si2-Si1  | 118.91(5)  |
| C2H-C7H     | 1.402(5)  | N3-Si2-Si1  | 107.59(5)  |
| C3H-C4H     | 1.350(6)  | C16-Si2-Si1 | 120.78(5)  |
| C4H-C5H     | 1.327(6)  | N4-Si2-Ga1  | 105.53(5)  |
| C5H-C6H     | 1.392(6)  | N3-Si2-Ga1  | 106.97(5)  |
| C6H-C7H     | 1.404(6)  | C16-Si2-Ga1 | 108.27(4)  |
| C1I-C2I     | 1.510(13) | Si1-Si2-Ga1 | 130.18(3)  |
| C2I-C7I     | 1.367(12) | C1-N2-C12   | 128.26(15) |
| C2I-C3I     | 1.420(12) | C1-N2-Si1   | 91.06(11)  |
| C3I-C4I     | 1.367(13) | C12-N2-Si1  | 130.34(11) |
| C4I-C5I     | 1.412(12) | C3-C2-C7    | 119.80(19) |
| C5I-C6I     | 1.356(12) | C3-C2-C1    | 120.32(19) |
| C6I-C7I     | 1.380(12) | C7-C2-C1    | 119.88(17) |
|             |           | C16-N3-C23  | 130.48(14) |
| C31-Ga1-Cl2 | 108.80(5) | C16-N3-Si2  | 90.96(10)  |
| C31-Ga1-Cl1 | 108.09(6) | C23-N3-Si2  | 136.63(11) |
| Cl2-Ga1-Cl1 | 103.75(2) | C2-C3-C4    | 118.9(2)   |
| C31-Ga1-Si2 | 131.07(5) | C16-N4-C27  | 131.96(13) |
| Cl2-Ga1-Si2 | 98.87(2)  | C16-N4-Si2  | 91.82(10)  |
| Cl1-Ga1-Si2 | 103.20(3) | C27-N4-Si2  | 136.10(11) |
| N1-Si1-N2   | 69.60(7)  | C5-C4-C3    | 120.5(2)   |
| N1-Si1-C1   | 34.75(6)  | C6-C5-C4    | 120.5(2)   |
| N2-Si1-C1   | 35.39(6)  | C5-C6-C7    | 119.6(2)   |
| N1-Si1-Si2  | 104.78(5) | C6-C7-C2    | 120.6(2)   |
| N2-Si1-Si2  | 104.90(5) | N1-C8-C9    | 105.19(16) |
| C1-Si1-Si2  | 112.79(5) | N1-C8-C11   | 110.88(17) |

|             |            |                |            |
|-------------|------------|----------------|------------|
| C9-C8-C11   | 109.0(2)   | C35-C31-C36    | 115.42(15) |
| N1-C8-C10   | 111.60(17) | C32-C31-Ga1    | 104.74(11) |
| C9-C8-C10   | 109.5(2)   | C35-C31-Ga1    | 100.77(11) |
| C11-C8-C10  | 110.5(2)   | C36-C31-Ga1    | 115.84(11) |
| N2-C12-C15  | 104.90(14) | C33-C32-C31    | 112.65(16) |
| N2-C12-C14  | 112.52(15) | C32-C33-C34    | 106.67(15) |
| C15-C12-C14 | 109.73(15) | C32-C33-C40    | 120.96(16) |
| N2-C12-C13  | 109.88(15) | C34-C33-C40    | 132.26(15) |
| C15-C12-C13 | 109.64(15) | C35-C34-C33    | 106.86(15) |
| C14-C12-C13 | 110.03(16) | C35-C34-C44    | 120.92(16) |
| N4-C16-N3   | 105.64(13) | C33-C34-C44    | 132.14(15) |
| N4-C16-C17  | 128.05(14) | C34-C35-C31    | 112.34(16) |
| N3-C16-C17  | 126.30(14) | C38-C36-C37    | 109.72(16) |
| N4-C16-Si2  | 52.56(8)   | C38-C36-C39    | 108.70(17) |
| N3-C16-Si2  | 53.23(8)   | C37-C36-C39    | 107.79(16) |
| C17-C16-Si2 | 175.67(12) | C38-C36-C31    | 111.00(15) |
| C22-C17-C18 | 120.21(15) | C37-C36-C31    | 111.53(16) |
| C22-C17-C16 | 120.13(15) | C39-C36-C31    | 108.00(15) |
| C18-C17-C16 | 119.66(15) | C42-C40-C41    | 109.73(16) |
| C19-C18-C17 | 119.33(16) | C42-C40-C33    | 114.00(15) |
| C20-C19-C18 | 120.34(17) | C41-C40-C33    | 110.78(15) |
| C19-C20-C21 | 120.23(16) | C42-C40-C43    | 105.37(15) |
| C20-C21-C22 | 119.87(17) | C41-C40-C43    | 107.40(16) |
| C17-C22-C21 | 119.98(16) | C33-C40-C43    | 109.23(15) |
| N3-C23-C25  | 105.10(14) | C46-C44-C34    | 112.62(15) |
| N3-C23-C26  | 111.42(14) | C46-C44-C45    | 106.16(16) |
| C25-C23-C26 | 109.43(16) | C34-C44-C45    | 110.19(15) |
| N3-C23-C24  | 111.33(14) | C46-C44-C47    | 111.28(17) |
| C25-C23-C24 | 108.79(14) | C34-C44-C47    | 110.68(16) |
| C26-C23-C24 | 110.60(16) | C45-C44-C47    | 105.59(16) |
| N4-C27-C30  | 104.98(13) | C31B-Ga1B-Cl1B | 108.92(5)  |
| N4-C27-C28  | 110.45(14) | C31B-Ga1B-Cl2B | 109.96(6)  |
| C30-C27-C28 | 109.66(15) | Cl1B-Ga1B-Cl2B | 102.21(2)  |
| N4-C27-C29  | 110.99(13) | C31B-Ga1B-Si2B | 129.85(5)  |
| C30-C27-C29 | 109.41(15) | Cl1B-Ga1B-Si2B | 99.71(2)   |
| C28-C27-C29 | 111.15(14) | Cl2B-Ga1B-Si2B | 102.76(3)  |
| C32-C31-C35 | 101.41(14) | N2B-Si1B-N1B   | 69.71(7)   |
| C32-C31-C36 | 116.46(15) | N2B-Si1B-C1B   | 35.00(6)   |

|                |            |                |            |
|----------------|------------|----------------|------------|
| N1B-Si1B-C1B   | 35.30(6)   | C5B-C6B-C7B    | 120.2(2)   |
| N2B-Si1B-Si2B  | 105.67(5)  | C2B-C7B-C6B    | 119.27(19) |
| N1B-Si1B-Si2B  | 104.33(5)  | N1B-C8B-C9B    | 104.52(14) |
| C1B-Si1B-Si2B  | 113.21(5)  | N1B-C8B-C10B   | 111.81(15) |
| C1B-N1B-C8B    | 129.80(14) | C9B-C8B-C10B   | 109.77(16) |
| C1B-N1B-Si1B   | 91.48(11)  | N1B-C8B-C11B   | 110.55(14) |
| C8B-N1B-Si1B   | 132.41(12) | C9B-C8B-C11B   | 109.93(16) |
| N2B-C1B-N1B    | 105.12(14) | C10B-C8B-C11B  | 110.13(16) |
| N2B-C1B-C2B    | 127.25(16) | N2B-C12B-C13B  | 105.28(15) |
| N1B-C1B-C2B    | 127.55(15) | N2B-C12B-C15B  | 110.95(15) |
| N2B-C1B-Si1B   | 52.99(9)   | C13B-C12B-C15B | 109.67(17) |
| N1B-C1B-Si1B   | 53.23(8)   | N2B-C12B-C14B  | 110.67(16) |
| C2B-C1B-Si1B   | 168.47(12) | C13B-C12B-C14B | 109.90(19) |
| N4B-Si2B-N3B   | 71.23(6)   | C15B-C12B-C14B | 110.26(17) |
| N4B-Si2B-C16B  | 35.54(6)   | N4B-C16B-N3B   | 105.82(14) |
| N3B-Si2B-C16B  | 35.79(6)   | N4B-C16B-C17B  | 127.96(15) |
| N4B-Si2B-Si1B  | 120.54(5)  | N3B-C16B-C17B  | 126.19(15) |
| N3B-Si2B-Si1B  | 108.35(5)  | N4B-C16B-Si2B  | 52.78(8)   |
| C16B-Si2B-Si1B | 122.53(5)  | N3B-C16B-Si2B  | 53.24(8)   |
| N4B-Si2B-Ga1B  | 105.74(5)  | C17B-C16B-Si2B | 174.60(12) |
| N3B-Si2B-Ga1B  | 107.10(5)  | C22B-C17B-C18B | 120.05(15) |
| C16B-Si2B-Ga1B | 108.21(4)  | C22B-C17B-C16B | 119.05(15) |
| Si1B-Si2B-Ga1B | 128.36(3)  | C18B-C17B-C16B | 120.88(15) |
| C1B-N2B-C12B   | 130.59(15) | C19B-C18B-C17B | 119.70(17) |
| C1B-N2B-Si1B   | 92.01(11)  | C20B-C19B-C18B | 119.97(18) |
| C12B-N2B-Si1B  | 136.01(12) | C21B-C20B-C19B | 120.57(17) |
| C7B-C2B-C3B    | 119.97(18) | C20B-C21B-C22B | 120.01(17) |
| C7B-C2B-C1B    | 120.19(16) | C21B-C22B-C17B | 119.68(17) |
| C3B-C2B-C1B    | 119.83(17) | N3B-C23B-C26B  | 105.05(14) |
| C16B-N3B-C23B  | 130.33(14) | N3B-C23B-C25B  | 110.97(14) |
| C16B-N3B-Si2B  | 90.96(10)  | C26B-C23B-C25B | 109.12(16) |
| C23B-N3B-Si2B  | 136.18(11) | N3B-C23B-C24B  | 112.02(14) |
| C4B-C3B-C2B    | 120.1(2)   | C26B-C23B-C24B | 108.84(15) |
| C16B-N4B-C27B  | 132.06(13) | C25B-C23B-C24B | 110.63(15) |
| C16B-N4B-Si2B  | 91.68(10)  | N4B-C27B-C30B  | 104.83(13) |
| C27B-N4B-Si2B  | 136.23(11) | N4B-C27B-C28B  | 110.96(14) |
| C5B-C4B-C3B    | 119.8(2)   | C30B-C27B-C28B | 109.89(15) |
| C6B-C5B-C4B    | 120.59(19) | N4B-C27B-C29B  | 110.80(14) |

|                |            |             |          |
|----------------|------------|-------------|----------|
| C30B-C27B-C29B | 109.56(15) | C5C-C4C-C3C | 120.2(2) |
| C28B-C27B-C29B | 110.64(15) | C6C-C5C-C4C | 119.3(2) |
| C35B-C31B-C32B | 101.73(14) | C5C-C6C-C7C | 120.2(2) |
| C35B-C31B-C36B | 117.07(15) | C6C-C7C-C2C | 121.2(2) |
| C32B-C31B-C36B | 116.92(15) | C7D-C2D-C3D | 118.8(2) |
| C35B-C31B-Ga1B | 104.67(11) | C7D-C2D-C1D | 121.4(3) |
| C32B-C31B-Ga1B | 97.05(11)  | C3D-C2D-C1D | 119.8(3) |
| C36B-C31B-Ga1B | 116.50(11) | C4D-C3D-C2D | 120.2(2) |
| C33B-C32B-C31B | 112.06(16) | C5D-C4D-C3D | 120.4(2) |
| C32B-C33B-C34B | 107.02(15) | C6D-C5D-C4D | 119.9(2) |
| C32B-C33B-C40B | 120.30(16) | C5D-C6D-C7D | 120.3(2) |
| C34B-C33B-C40B | 132.67(15) | C6D-C7D-C2D | 120.5(2) |
| C35B-C34B-C33B | 106.59(15) | C7E-C2E-C3E | 120.2(2) |
| C35B-C34B-C44B | 121.40(15) | C7E-C2E-C1E | 121.2(4) |
| C33B-C34B-C44B | 131.97(15) | C3E-C2E-C1E | 118.5(4) |
| C34B-C35B-C31B | 112.40(15) | C4E-C3E-C2E | 118.8(2) |
| C37B-C36B-C38B | 109.35(16) | C5E-C4E-C3E | 120.5(2) |
| C37B-C36B-C39B | 108.62(16) | C6E-C5E-C4E | 120.3(2) |
| C38B-C36B-C39B | 107.93(17) | C5E-C6E-C7E | 119.9(2) |
| C37B-C36B-C31B | 111.14(16) | C6E-C7E-C2E | 120.4(2) |
| C38B-C36B-C31B | 111.43(15) | C7F-C2F-C3F | 118.5(4) |
| C39B-C36B-C31B | 108.27(15) | C7F-C2F-C1F | 121.7(4) |
| C42B-C40B-C41B | 106.05(15) | C3F-C2F-C1F | 119.8(4) |
| C42B-C40B-C43B | 110.77(16) | C4F-C3F-C2F | 119.4(6) |
| C41B-C40B-C43B | 105.90(15) | C3F-C4F-C5F | 122.0(6) |
| C42B-C40B-C33B | 112.79(14) | C6F-C5F-C4F | 118.9(5) |
| C41B-C40B-C33B | 109.85(15) | C5F-C6F-C7F | 120.3(5) |
| C43B-C40B-C33B | 111.13(14) | C6F-C7F-C2F | 121.0(5) |
| C46B-C44B-C45B | 109.91(15) | C7G-C2G-C3G | 119.2(7) |
| C46B-C44B-C47B | 105.68(15) | C7G-C2G-C1G | 120.6(7) |
| C45B-C44B-C47B | 106.81(15) | C3G-C2G-C1G | 120.2(6) |
| C46B-C44B-C34B | 113.07(15) | C4G-C3G-C2G | 119.9(7) |
| C45B-C44B-C34B | 111.51(15) | C5G-C4G-C3G | 120.2(7) |
| C47B-C44B-C34B | 109.51(14) | C4G-C5G-C6G | 120.6(6) |
| C7C-C2C-C3C    | 117.80(19) | C7G-C6G-C5G | 119.5(6) |
| C7C-C2C-C1C    | 120.8(2)   | C2G-C7G-C6G | 120.5(8) |
| C3C-C2C-C1C    | 121.35(19) | C3H-C2H-C7H | 116.6(3) |
| C4C-C3C-C2C    | 121.2(2)   | C3H-C2H-C1H | 121.2(4) |

|             |           |             |           |
|-------------|-----------|-------------|-----------|
| C7H-C2H-C1H | 122.2(4)  | C7I-C2I-C1I | 124.3(14) |
| C4H-C3H-C2H | 123.8(4)  | C3I-C2I-C1I | 120.5(14) |
| C5H-C4H-C3H | 119.1(4)  | C4I-C3I-C2I | 119.1(14) |
| C4H-C5H-C6H | 122.0(4)  | C3I-C4I-C5I | 121.4(14) |
| C5H-C6H-C7H | 118.3(4)  | C6I-C5I-C4I | 119.3(14) |
| C2H-C7H-C6H | 120.0(4)  | C5I-C6I-C7I | 116.1(15) |
| C7I-C2I-C3I | 114.7(13) | C2I-C7I-C6I | 124.4(15) |

---

## References

1. (a) D. Stalke, *Chem. Soc. Rev.* 1998, **27**, 171-178; (b) T. Kottke, D. Stalke, *J. Appl. Crystallogr.* 1993, **26**, 615-619.
2. T. Schulz, K. Meindl, D. Leusser, D. Stern, J. Graf, C. Michaelsen, M. Ruf, G. M. Sheldrick, D. Stalke, *J. Appl. Crystallogr.* 2009, **42**, 885-891.
3. Bruker AXS Inc., in *Bruker Apex CCD, SAINT v8.30C* (Ed.: Bruker AXS Inst. Inc.), WI, USA, Madison, 2013.
4. L. Krause, R. Herbst-Irmer, G. M. Sheldrick, D. Stalke, *J. Appl. Crystallogr.* 2015, **48**, 3-10.
5. L. Krause, R. Herbst-Irmer, D. Stalke, *J. Appl. Cryst.* 2015, **48**, 1907-1913.
6. G. M. Sheldrick, *Acta Crystallogr.* 2015, **A71**, 3-8.
7. G. M. Sheldrick, *Acta Crystallogr.* 2015, **C71**, 3-8.
8. C. B. Hübschle, G. M. Sheldrick, B. Dittrich, *J. Appl. Crystallogr.* 2011, **44**, 1281-1284.
